# Supplementary material
Source: MDPI journal article supplement (https://www.mdpi.com/2073-4441/11/7/1383)
Supplement: s1 [file s1]

Article

# Supplementary for “Simulation and Analysis of the Water Balance of the Nam Co Lake Using SWAT Model”

Muhammad Adnan, Shichang Kang, Guoshuai Zhang, Muhammad Saifullah, Muhammad Naveed Anjum and Ayaz Fateh Ali

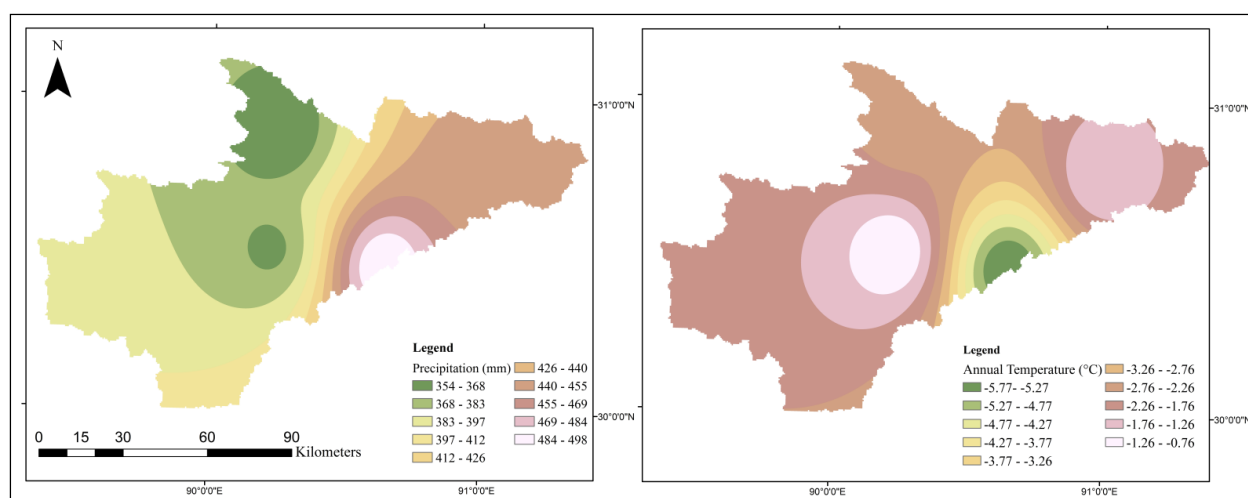

**Figure 1.** Spatial variations of the average annual temperature and precipitation in the Nam Co basin from 2007–2013.

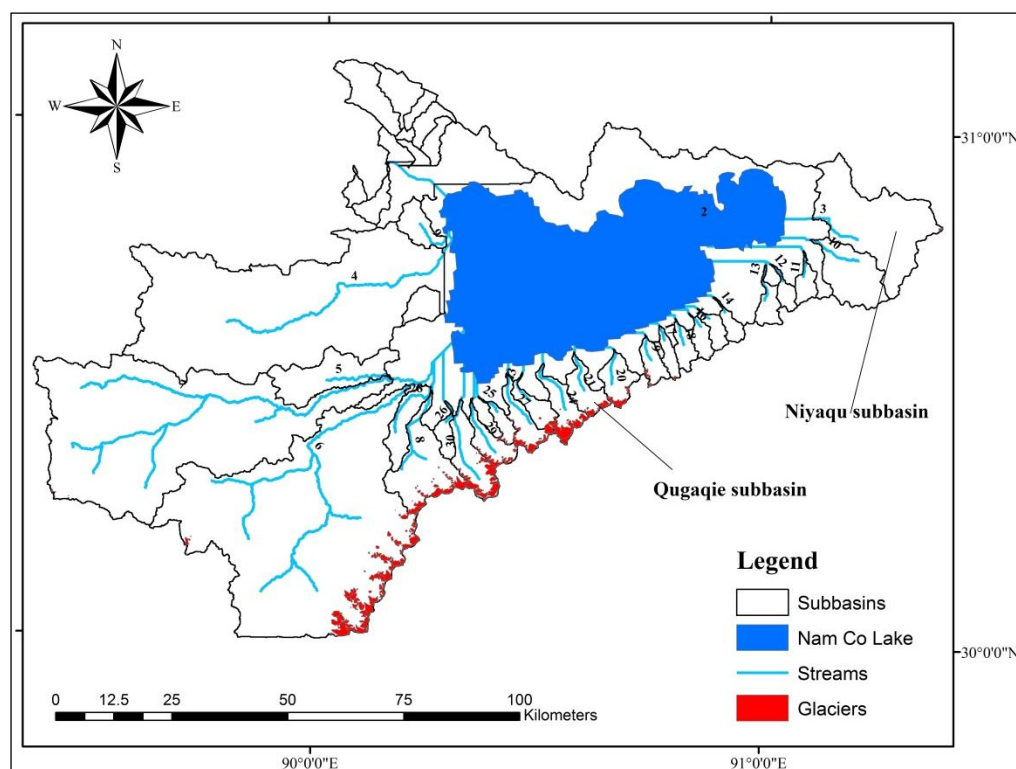

**Figure 2.** Location map of glaciated, and non-glaciated subbasins in the Nam Co Lake basin.

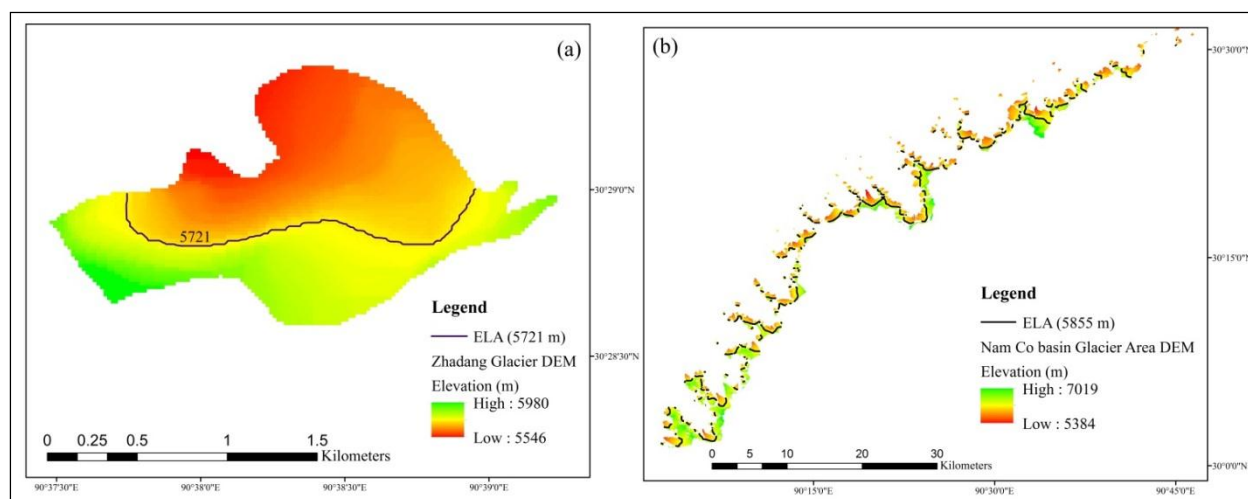

**Figure 3.** Equilibrium Line Altitude of, (a) Zhadang glacier, (b) Nam Co basin glaciers.

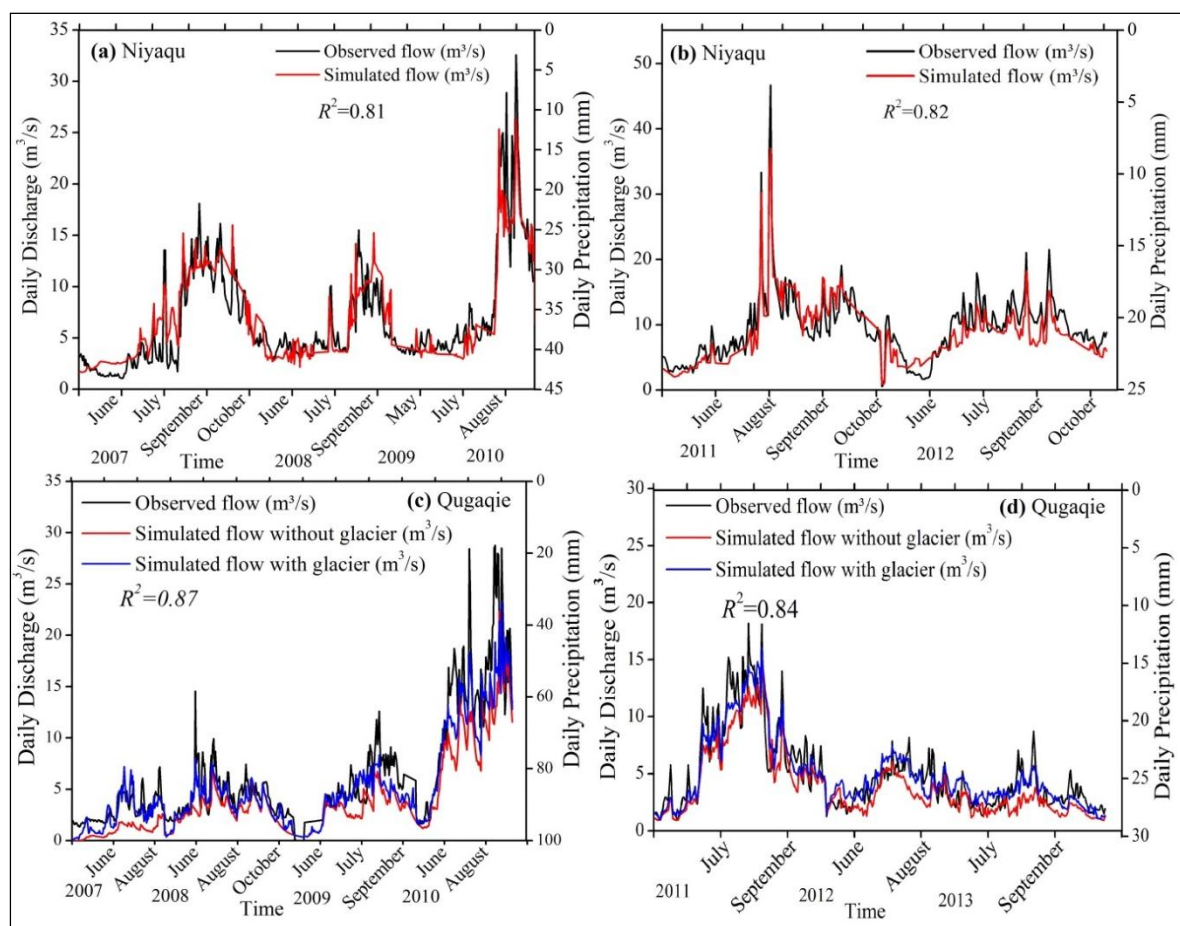

**Figure 4.** (a–b) Calibration and validation of Niyagu subbasin; (c–d) Calibration and validation of Qugaqie subbasin at the daily time scale.

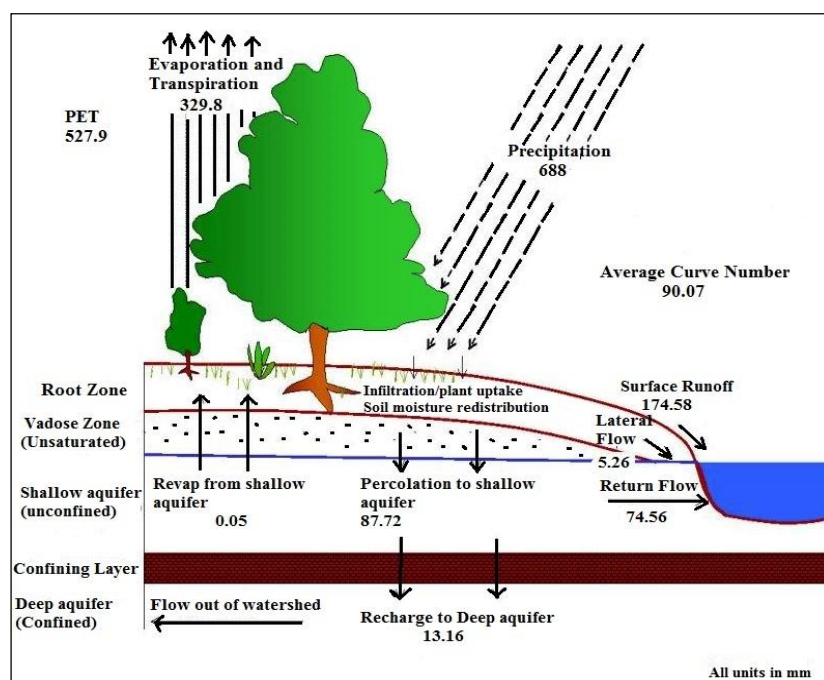

**Figure 5.** Average values of hydrology components of the Nam Co basin from 2007-2015 using SWAT model.

**Table 1.** Elevation belts of the whole Nam Co basin glaciers.

| Class #                               | Elevation Range (m) | Mid Elevation (m) | Area (Km <sup>2</sup> ) |
|---------------------------------------|---------------------|-------------------|-------------------------|
| 1                                     | 5384-5484           | 5434              | 0.3888                  |
| 2                                     | 5484-5584           | 5534              | 3.5235                  |
| 3                                     | 5584-5684           | 5634              | 16.2178                 |
| 4                                     | 5684-5784           | 5734              | 32.5222                 |
| 5                                     | 5784-5884           | 5834              | 37.2607                 |
| 6                                     | 5884-5984           | 5934              | 25.4634                 |
| 7                                     | 5984-6084           | 6034              | 14.5034                 |
| 8                                     | 6084-6184           | 6134              | 5.3136                  |
| 9                                     | 6184-6284           | 6234              | 1.377                   |
| 10                                    | 6284-7019           | 6652              | 0.6642                  |
| Total Glacier Area (Km <sup>2</sup> ) |                     |                   | 137.2161                |
